# Supplementary material for: Clinical Evaluation of the BIOFIRE SPOTFIRE Respiratory Panel
Source: MDPI journal article supplement (doi:10.3390/v16040600), 2024-04-13
Supplement: s1 [file s1]

**Table S1** Patient demographics

|                      |                                          | Number (%)  |
|----------------------|------------------------------------------|-------------|
| NIH style age groups | Neonates or newborns (birth to <1 month) | 1 (0.68%)   |
|                      | Infants (1 month to <1 year)             | 5 (3.42%)   |
|                      | Children (1 year to 12 years)            | 89 (60.96%) |
|                      | Adolescents (13 years to 17 years)       | 7 (4.79%)   |
|                      | Adults (18 years to 64 years)            | 25 (17.12%) |
|                      | Older adults (65 years or older)         | 19 (13.01%) |
| Gender               | Male                                     | 82 (56.16%) |
|                      | Female                                   | 64 (43.84%) |
| Patient type         | Inpatients                               | 76 (52.05%) |
|                      | Outpatients                              | 70 (47.95%) |

**Table S2** Frequency of detection for individual pathogens and discrepant analysis (upper respiratory tract specimens)

| Pathogen targets               | No. of positive specimens |                        | Discrepant analysis                                                                                                                                                                                                    |
|--------------------------------|---------------------------|------------------------|------------------------------------------------------------------------------------------------------------------------------------------------------------------------------------------------------------------------|
|                                | RP2.1plus                 | SPOTFIRE R             |                                                                                                                                                                                                                        |
| Adenovirus                     | 15                        | 18                     | Two specimens were positive by RP2.1plus and negative by SPOTFIRE R Panel. The Ct values were 40 by the alternative method.                                                                                            |
|                                |                           |                        | Two specimens were negative by RP2.1plus and positive by SPOTFIRE R Panel. The Ct values were 37.8 and 40 by the alternative method.                                                                                   |
|                                |                           |                        | Three specimens were negative by RP2.1plus and positive by SPOTFIRE R Panel. The results were negative by the alternative method. The patients had no recent history of adenovirus infection.                          |
|                                |                           |                        | <b>SPOTFIRE R Panel: 2FN, 3FP, 113TN and 15TP</b>                                                                                                                                                                      |
| <b>Coronavirus</b>             |                           |                        | Reported as 'coronavirus (seasonal)' without subtype by SPOTFIRE R Panel.                                                                                                                                              |
| 229E                           | 3                         | 3                      | One specimen was negative by RP2.1plus and positive by SPOTFIRE R Panel. The result was negative by the alternative method. The patient had no recent history of coronavirus infection.                                |
| HKU1                           | 2                         | 2                      |                                                                                                                                                                                                                        |
| NL63                           | 7                         | 7                      |                                                                                                                                                                                                                        |
| OC43                           | 6                         | 6                      |                                                                                                                                                                                                                        |
| Unclassified                   | 0                         | 1                      | <b>SPOTFIRE R Panel: 0FN, 1FP, 114TN and 18TP</b>                                                                                                                                                                      |
| SARS-CoV-2                     | 17                        | 18                     | One specimen was positive by RP2.1plus and negative by SPOTFIRE R Panel. The result was negative by the alternative method. The patient had no recent history of SARS-CoV-2 infection.                                 |
|                                |                           |                        | Two specimens were negative by RP2.1plus and positive by SPOTFIRE R Panel. The Ct values were 40 and 44.3 by the alternative method.                                                                                   |
|                                |                           |                        | <b>SPOTFIRE R Panel: 0FN, 0FP, 118TN and 15TP</b>                                                                                                                                                                      |
| Metapneumovirus                | 6                         | 6                      | <b>SPOTFIRE R Panel: 0FN, 0FP, 127TN and 6TP</b>                                                                                                                                                                       |
| Rhinovirus/<br>enterovirus     | 23                        | 34                     | One specimen was positive by RP2.1plus and negative by SPOTFIRE R Panel. Rhinovirus was detected by the alternative method.                                                                                            |
|                                |                           |                        | Eleven specimens were negative by RP2.1plus and positive by SPOTFIRE R Panel. Rhinovirus was detected by the alternative method.                                                                                       |
|                                |                           |                        | One specimen was negative by RP2.1plus and positive by SPOTFIRE R Panel. Rhinovirus and enterovirus were not detected by the alternative methods. No clinical history was available.                                   |
|                                |                           |                        | <b>SPOTFIRE R Panel: 1FN, 1FP, 98TN and 33TP</b>                                                                                                                                                                       |
| <b>Influenza A virus</b>       | <b>41</b>                 | <b>41</b>              | <b>SPOTFIRE R Panel: 0FN, 0FP, 92TN and 41TP</b>                                                                                                                                                                       |
| No subtype/<br>equivocal       | 1                         | 1                      | H1-2009 was detected by the alternative method, The Ct value was 30.65.                                                                                                                                                |
| H1-2009                        | 14                        | 13<br>(+ 1 no subtype) | The result of SPOTFIRE R Panel for the discrepant specimen was 'no subtype'. The Ct value was 36.2 by the alternative method.                                                                                          |
|                                |                           |                        | <b>SPOTFIRE R Panel: 1FN, 0FP, 119TN and 13TP</b>                                                                                                                                                                      |
| H3                             | 25<br>(+1 no subtype)     | 26                     | The result of RP2.1plus for the discrepant specimen was 'no subtype' in the first run and 'equivocal' in the repeated run. For SPOTFIRE R Panel, the result was 'H3'. The Ct value was 31.6 by the alternative method. |
|                                |                           |                        | <b>SPOTFIRE R Panel: 0FN, 0FP, 106TN and 27TP</b>                                                                                                                                                                      |
| Influenza B virus              | 8                         | 8                      | <b>SPOTFIRE R Panel: 0FN, 0FP, 125TN and 8TP</b>                                                                                                                                                                       |
| <b>Parainfluenza virus</b>     |                           |                        | Reported as 'parainfluenza virus' without subtype by SPOTFIRE R Panel.                                                                                                                                                 |
| Type 1                         | 7                         | 7                      | The discrepant specimen was negative by RP2.1plus and positive by SPOTFIRE R Panel. Parainfluenza virus 4 was detected by the alternative method.                                                                      |
| Type 2                         | 5                         | 5                      |                                                                                                                                                                                                                        |
| Type 3                         | 7                         | 7                      |                                                                                                                                                                                                                        |
| Type 4                         | 3                         | 4                      |                                                                                                                                                                                                                        |
|                                |                           |                        | <b>SPOTFIRE R Panel: 0FN, 0FP, 110TN and 23TP</b>                                                                                                                                                                      |
| Respiratory<br>syncytial virus | 10                        | 10                     | One specimen was positive by RP2.1plus and negative by SPOTFIRE R Panel. The result was negative by the alternative method, and vice versa.                                                                            |
|                                |                           |                        | <b>SPOTFIRE R Panel: 0FN, 1FP, 123TN and 9TP</b>                                                                                                                                                                       |
| <i>B. paraptussis</i>          | 3                         | 4                      | One specimen was negative by RP2.1plus and positive by SPOTFIRE R Panel. The result was negative by the alternative method. No clinical history was available.                                                         |
|                                |                           |                        | <b>SPOTFIRE R Panel: 0FN, 1FP, 129TN and 3TP</b>                                                                                                                                                                       |
| <i>B. pertussis</i>            | 2                         | 2                      | <b>SPOTFIRE R Panel: 0FN, 0FP, 131TN and 2TP</b>                                                                                                                                                                       |
| <i>C. pneumoniae</i>           | 1                         | 1                      | <b>SPOTFIRE R Panel: 0FN, 0FP, 132TN and 1TP</b>                                                                                                                                                                       |
| <i>M. pneumoniae</i>           | 13                        | 13                     | <b>SPOTFIRE R Panel: 0FN, 0FP, 120TN and 13TP</b>                                                                                                                                                                      |

Ct, threshold cycle; FN, false negative; FP, false positive; TN, true negative; TP, true positive

**Table S3** Discrepant analysis of co-detections (upper respiratory tract specimens)

| Specimen |        | Results              |                                         |                                                                                                                                                | Remarks                |
|----------|--------|----------------------|-----------------------------------------|------------------------------------------------------------------------------------------------------------------------------------------------|------------------------|
| No.      | Type   | RP2.1plus            | SPOTFIRE R                              | Discrepant analysis                                                                                                                            |                        |
| 1        | NPS    | Flu A H3             | Flu A H3<br>RV/EV                       | Rhinovirus was detected                                                                                                                        | RP2.1plus < SPOTFIRE R |
| 2        | NPS    | Flu A H3<br>RV/EV    | Flu A H3<br>RV/EV<br>BPP                | <i>B. paraptussis</i> was not detected. No clinical history was available.                                                                     | RP2.1plus = SPOTFIRE R |
| 9        | NPS    | Flu A H3             | Flu A H3<br>ADV<br>PIV                  | Adenovirus was not detected. No recent history of adenovirus infection.<br>Parainfluenza virus 4 was detected                                  | RP2.1plus < SPOTFIRE R |
| 10       | NPS    | Flu A H3             | Flu A H3<br>RV/EV                       | Rhinovirus was detected                                                                                                                        | RP2.1plus < SPOTFIRE R |
| 19       | NS-TS  | SARS-CoV-2<br>ADV    | ADV                                     | SARS-CoV-2 was not detected. No recent history of SARS-CoV-2 infection.                                                                        | RP2.1plus = SPOTFIRE R |
| 20       | NPS    | MP                   | MP<br>RV/EV                             | Rhinovirus was detected. Rhinovirus was detected by RP2.1plus 5 days ago.                                                                      | RP2.1plus < SPOTFIRE R |
| 22       | NS     | PIV4                 | PIV4<br>ADV                             | Adenovirus was not detected. No recent history of adenovirus infection.                                                                        | RP2.1plus = SPOTFIRE R |
| 28       | NPS    | ADV<br>RV/EV         | RV/EV                                   | Adenovirus was detected (Ct value: 40)                                                                                                         | RP2.1plus > SPOTFIRE R |
| 29       | NPS-TS | ADV                  | ADV<br>CoV<br>RV/EV                     | Seasonal coronavirus was not detected with no recent history of infection<br>Rhinovirus was detected                                           | RP2.1plus < SPOTFIRE R |
| 32       | NPS    | PIV3<br>CoV OC43     | PIV<br>CoV<br>ADV<br>SARS-CoV-2         | Adenovirus was not detected with no recent history of infection<br>SARS-CoV-2 was detected (Ct value: 44.3)                                    | RP2.1plus < SPOTFIRE R |
| 41       | NPS    | PIV3<br>RV/EV        | PIV                                     | Rhinovirus was detected                                                                                                                        | RP2.1plus > SPOTFIRE R |
| 45       | NPS    | RSV<br>CoV NL63      | RSV<br>CoV<br>RV/EV                     | Rhinovirus was detected                                                                                                                        | RP2.1plus < SPOTFIRE R |
| 55       | NPS    | Flu A H1-2009        | Flu A H1-2009<br>RV/EV                  | Rhinovirus was detected                                                                                                                        | RP2.1plus < SPOTFIRE R |
| 70       | NPS    | RV/EV<br>MP          | RV/EV<br>MP<br>ADV<br>SARS-CoV-2<br>RSV | Adenovirus was detected (Ct value: 40)<br>SARS-CoV-2 was detected (Ct value: 38.2)<br>RSV was not detected. No clinical history was available. | RP2.1plus < SPOTFIRE R |
| 78       | NPS    | MP                   | MP<br>ADV                               | Adenovirus was detected (Ct value: 37.8)                                                                                                       | RP2.1plus < SPOTFIRE R |
| 79       | NPS    | BP                   | BP<br>RV/EV                             | Rhinovirus or enterovirus was not detected. No clinical history was available.                                                                 | RP2.1plus = SPOTFIRE R |
| 84       | NPS    | Flu A H1-2009        | Flu A H1-2009<br>RV/EV                  | Rhinovirus was detected                                                                                                                        | RP2.1plus < SPOTFIRE R |
| 87       | NPS    | PIV2                 | PIV<br>RV/EV                            | Rhinovirus was detected                                                                                                                        | RP2.1plus < SPOTFIRE R |
| 91       | NPS    | SARS-CoV-2<br>RSV    | SARS-CoV-2<br>RSV<br>RV/EV              | Rhinovirus was detected                                                                                                                        | RP2.1plus < SPOTFIRE R |
| 102      | NPS    | ADV<br>RSV           | ADV                                     | Respiratory syncytial virus was not detected                                                                                                   | RP2.1plus = SPOTFIRE R |
| 126      | NPS    | CoV NL63             | CoV<br>RV/EV                            | Rhinovirus was detected                                                                                                                        | RP2.1plus < SPOTFIRE R |
| 137      | NPS-TS | CoV NL63<br>PIV2 & 4 | CoV<br>PIV<br>RV/EV                     | Rhinovirus was detected                                                                                                                        | RP2.1plus < SPOTFIRE R |
| 142      | NPS    | ADV<br>RV/EV         | RV/EV                                   | Adenovirus was detected (Ct value: 40)                                                                                                         | RP2.1plus > SPOTFIRE R |

ADV, adenovirus; BPP, *Bordetella paraptussis*; CoV, coronavirus; Ct, threshold cycle; Flu, influenza; MP, *Mycoplasma pneumoniae*; NPS, nasopharyngeal swab; NS, nasal swab; TS, throat swab; PIV, parainfluenza virus; RSV, respiratory syncytial virus; RV/EV, rhinovirus/enterovirus

**Table S4** Results on lower respiratory tract specimens

| Specimen No. | Type   | RP2.1 <i>plus</i> results                                                          | SPOTFIRE R results          | Remarks                                      |
|--------------|--------|------------------------------------------------------------------------------------|-----------------------------|----------------------------------------------|
| 63           | Sputum | 1 <sup>st</sup> run: flu A (no subtype)<br>2 <sup>nd</sup> run: flu A (no subtype) | Flu A (no subtype)          | Alternative method:<br>H1-2009, Ct value: 41 |
| 83           | BALF   | <i>Chlamydia pneumoniae</i>                                                        | <i>Chlamydia pneumoniae</i> |                                              |
| 90           | Sputum | SARS-CoV-2<br>Flu A H3                                                             | SARS-CoV-2<br>Flu A H3      |                                              |
| 100          | Sputum | Negative                                                                           | Negative                    |                                              |
| 101          | Sputum | Parainfluenza virus 3                                                              | Parainfluenza virus         |                                              |
| 103          | Sputum | Negative                                                                           | Negative                    |                                              |
| 114          | Sputum | Respiratory syncytial virus                                                        | Respiratory syncytial virus |                                              |
| 115          | ETA    | Negative                                                                           | Negative                    |                                              |
| 116          | Sputum | Flu A H3                                                                           | Flu A H3                    |                                              |
| 117          | Sputum | Negative                                                                           | Negative                    |                                              |
| 118          | Sputum | SARS-CoV-2                                                                         | SARS-CoV-2                  |                                              |
| 119          | Sputum | SARS-CoV-2                                                                         | SARS-CoV-2                  |                                              |
| 120          | Sputum | Negative                                                                           | Negative                    |                                              |

BALF, bronchoalveolar lavage fluid; ETA, endotracheal aspirate; flu A, influenza A virus; SARS-CoV-2, severe acute respiratory syndrome coronavirus 2.

**Table S5** Results on EQAP samples

| Sample | RP2.1 <i>plus</i> results                     | SPOTFIRE R results                          | Expected results                              |
|--------|-----------------------------------------------|---------------------------------------------|-----------------------------------------------|
| 1      | Influenza B virus<br>Parainfluenza virus 1    | Influenza B virus<br>Parainfluenza virus    | Influenza B virus<br>Parainfluenza virus 1    |
| 2      | Influenza A virus H1-2009                     | Influenza A virus H1-2009                   | Influenza A virus H1-2009                     |
| 3      | Influenza B virus<br>Rhinovirus/enterovirus   | Influenza B virus<br>Rhinovirus/enterovirus | Influenza B virus<br>Rhinovirus/enterovirus   |
| 4      | Influenza A virus H3<br>Parainfluenza virus 4 | Influenza A virus H3<br>Parainfluenza virus | Influenza A virus H3<br>Parainfluenza virus 4 |
| 5      | Adenovirus<br><i>Bordetella pertussis</i>     | Adenovirus<br><i>Bordetella pertussis</i>   | Adenovirus<br><i>Bordetella pertussis</i>     |
